# Supplementary material for: Reach and Acceptability of a Mobile Reminder Strategy and Facebook Group Intervention for Weight Management in Less Advantaged Adolescents: Insights From the PRALIMAP-INÈS Trial
Source: PubMed Central journal article supplement (PMC5984273; doi:10.2196/mhealth.7657), 2018-05-18
Supplement: mhealth_v6i5e110_app1.pdf [file mhealth_v6i5e110_app1.pdf]

## Multimedia Appendix 1 : Screenshot of one of the Facebook challenges

8 février 2014

Défi: Zumba 😊  
Catégorie: découverte  
Durée: 2 semaines  
Objectif: Eclatez-vous en faisant de la zumba en visionnant la vidéo proposer ou une autre que vous chercherez si vous voulez 😊  
Pourquoi: cela permet de s'amuser tout en bougeant tous son corps ...  
Afficher la suite

 Fitness Master Class - Zumba avec Jessica Mellet  
Cette semaine, Lucile accueille Jessica Mellet, LA prof de Zumba Fitness, pour une séance de Zumba ultra-dynamique ! Au programme ? De la danse, ...  
YOUTUBE.COM

J'aime Commenter Partager

aiment Vu par 10 personnes ça.

Afficher 1 autre commentaire

J'ai adoré la coach explique super bien 😊  
22 février 2014, 11:22 · Je n'aime plus · 1

Défi réussi j'adore la zumba sa fait vraiment bouger et je suis d'accord avec Marion la musique nous motive 😊  
22 février 2014, 11:48 · Je n'aime plus · 1

Au début c'est pas intéressant mais a la fin on se demande quand est ce que ça recommence :)  
22 février 2014, 19:29 · Je n'aime plus · 1

Écrire un commentaire...

### English Translation

Challenge : Zumba 😊

Category : discovery

Length : two weeks

Objective : have fun by following this zumba video or any other you can find 😊

Why : you can have fun and at the same time move your body...

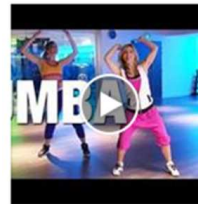

Fitness Master Class – Zumba with Jessica Mellet

This week, Lucile welcomes Jessica Mellet, LA Zumba Fitness instructor, for an ultra-dynamic Zumba session ! Programme of the day ? Danse...

YOUTUBE.COM

Comments

I loved it the coach explains things really well 😊

I succeeded in this challenge I love zumba it really makes you move and I agree with X the music is really motivating 😊

At the beginning I didn't find it interesting but by the end I wanted to start over again :)
